# Supplementary material for: Gene transcriptional networks integrate microenvironmental signals in human breast cancer
Source: Royal Society of Chemistry journal article supplement (doi:10.1039/c0ib00087f), 2010-12-16
Supplement: c0ib00087f.pdf [file c0ib00087f.pdf]

| Gene symbol | Category                      |
|-------------|-------------------------------|
| ACAN        | ECM                           |
| ADAM10      | ECM remodeling-related        |
| ADAM11      | ECM remodeling-related        |
| ADAM12      | ECM remodeling-related        |
| ADAM15      | ECM remodeling-related        |
| ADAM17      | ECM remodeling-related        |
| ADAM18      | ECM remodeling-related        |
| ADAM19      | ECM remodeling-related        |
| ADAM2       | ECM remodeling-related        |
| ADAM20      | ECM remodeling-related        |
| ADAM21      | ECM remodeling-related        |
| ADAM22      | ECM remodeling-related        |
| ADAM23      | ECM remodeling-related        |
| ADAM28      | ECM remodeling-related        |
| ADAM29      | ECM remodeling-related        |
| ADAM3       | ECM remodeling-related        |
| ADAM30      | ECM remodeling-related        |
| ADAM5       | ECM remodeling-related        |
| ADAM7       | ECM remodeling-related        |
| ADAM8       | ECM remodeling-related        |
| ADAM9       | ECM remodeling-related        |
| ADAMTS1     | ECM remodeling-related        |
| ADAMTS10    | ECM remodeling-related        |
| ADAMTS12    | ECM remodeling-related        |
| ADAMTS13    | ECM remodeling-related        |
| ADAMTS14    | ECM remodeling-related        |
| ADAMTS15    | ECM remodeling-related        |
| ADAMTS16    | ECM remodeling-related        |
| ADAMTS17    | ECM remodeling-related        |
| ADAMTS18    | ECM remodeling-related        |
| ADAMTS19    | ECM remodeling-related        |
| ADAMTS2     | ECM remodeling-related        |
| ADAMTS20    | ECM remodeling-related        |
| ADAMTS3     | ECM remodeling-related        |
| ADAMTS4     | ECM remodeling-related        |
| ADAMTS5     | ECM remodeling-related        |
| ADAMTS6     | ECM remodeling-related        |
| ADAMTS7     | ECM remodeling-related        |
| ADAMTS8     | ECM remodeling-related        |
| ADAMTS9     | ECM remodeling-related        |
| ADAMTSL1    | ECM remodeling-related        |
| ADAMTSL2    | ECM remodeling-related        |
| ADAMTSL3    | ECM remodeling-related        |
| ADAMTSL4    | ECM remodeling-related        |
| ADAMTSL5    | ECM remodeling-related        |
| AGRIN       | ECM                           |
| ALCAM       | Cell-cell adhesion            |
| ANGPT1      | Soluble factors and receptors |
| ANGPT2      | Soluble factors and receptors |
| ANGPT4      | Soluble factors and receptors |
| ANGPTL1     | Soluble factors and receptors |
| ANGPTL2     | Soluble factors and receptors |
| ANGPTL3     | Soluble factors and receptors |
| ANGPTL4     | Soluble factors and receptors |
| ANGPTL7     | Soluble factors and receptors |

|         |                               |
|---------|-------------------------------|
| AREG    | Soluble factors and receptors |
| ATRN    | Soluble factors and receptors |
| ATRN1   | Soluble factors and receptors |
| BAI1    | Soluble factors and receptors |
| BAI2    | Soluble factors and receptors |
| BAI3    | Soluble factors and receptors |
| BCAN    | ECM                           |
| BEHAB   | ECM                           |
| BGLAP   | ECM remodeling-related        |
| BGN     | ECM                           |
| BMP1    | ECM remodeling-related        |
| BMP10   | Soluble factors and receptors |
| BMP15   | Soluble factors and receptors |
| BMP2    | Soluble factors and receptors |
| BMP3    | Soluble factors and receptors |
| BMP4    | Soluble factors and receptors |
| BMP5    | Soluble factors and receptors |
| BMP6    | Soluble factors and receptors |
| BMP7    | Soluble factors and receptors |
| BMP8A   | Soluble factors and receptors |
| BMP8B   | Soluble factors and receptors |
| BMPR1   | Soluble factors and receptors |
| BMPR2   | Soluble factors and receptors |
| BTC     | Soluble factors and receptors |
| C6      | Soluble factors and receptors |
| C7      | Soluble factors and receptors |
| C8A     | Soluble factors and receptors |
| C9      | Soluble factors and receptors |
| C9orf8  | ECM remodeling-related        |
| C9orf94 | ECM remodeling-related        |
| CCL1    | Soluble factors and receptors |
| CCL10   | Soluble factors and receptors |
| CCL11   | Soluble factors and receptors |
| CCL12   | Soluble factors and receptors |
| CCL2    | Soluble factors and receptors |
| CCL22   | Soluble factors and receptors |
| CCL23   | Soluble factors and receptors |
| CCL24   | Soluble factors and receptors |
| CCL25   | Soluble factors and receptors |
| CCL26   | Soluble factors and receptors |
| CCL27   | Soluble factors and receptors |
| CCL28   | Soluble factors and receptors |
| CCL3    | Soluble factors and receptors |
| CCL4    | Soluble factors and receptors |
| CCL5    | Soluble factors and receptors |
| CCL6    | Soluble factors and receptors |
| CCL7    | Soluble factors and receptors |
| CCL8    | Soluble factors and receptors |
| CCL9    | Soluble factors and receptors |
| CCR1    | Soluble factors and receptors |
| CCR10   | Soluble factors and receptors |
| CCR2    | Soluble factors and receptors |
| CCR3    | Soluble factors and receptors |
| CCR4    | Soluble factors and receptors |
| CCR5    | Soluble factors and receptors |
| CCR6    | Soluble factors and receptors |

CCR7 Soluble factors and receptors  
CCR8 Soluble factors and receptors  
CCR9 Soluble factors and receptors  
CD120 Soluble factors and receptors  
CD146 cell-cell adhesion  
CD153 Soluble factors and receptors  
CD154 Soluble factors and receptors  
CD164 cell-cell adhesion  
CD22 cell-cell adhesion  
CD24 cell-cell adhesion  
CD27 Soluble factors and receptors  
CD40 Soluble factors and receptors

CD44 Cell-cell adhesion  
CD44 cell-cell adhesion  
CD70 Soluble factors and receptors  
CDH1 cell-cell adhesion  
CDH11 cell-cell adhesion  
CDH12 cell-cell adhesion  
CDH13 cell-cell adhesion  
CDH15 cell-cell adhesion  
CDH16 cell-cell adhesion  
CDH17 cell-cell adhesion  
CDH2 cell-cell adhesion  
CDH3 cell-cell adhesion  
CDH4 cell-cell adhesion  
CDH5 cell-cell adhesion  
CDH6 cell-cell adhesion  
CDH8 cell-cell adhesion  
CEACAM1 cell-cell adhesion  
CEACAM16 cell-cell adhesion  
CEACAM18 cell-cell adhesion  
CEACAM19 cell-cell adhesion  
CEACAM20 cell-cell adhesion  
CEACAM21 cell-cell adhesion  
CEACAM3 cell-cell adhesion  
CEACAM4 cell-cell adhesion  
CEACAM5 cell-cell adhesion  
CEACAM6 cell-cell adhesion  
CEACAM7 cell-cell adhesion  
CEACAM8 cell-cell adhesion  
CELSR1 cell-cell adhesion  
CELSR1 cell-cell adhesion  
CELSR2 cell-cell adhesion  
CELSR2 cell-cell adhesion  
CELSR3 cell-cell adhesion  
CELSR3 cell-cell adhesion  
CFP Soluble factors and receptors  
CLSTN1 cell-cell adhesion  
CLSTN2 cell-cell adhesion  
CLSTN3 cell-cell adhesion  
CNTNAP1 Soluble factors and receptors  
CNTNAP2 Soluble factors and receptors  
CNTNAP3 Soluble factors and receptors  
CNTNAP4 Soluble factors and receptors  
CNTNAP5 Soluble factors and receptors

|         |                               |
|---------|-------------------------------|
| COL10A1 | ECM                           |
| COL11A2 | ECM                           |
| COL11A2 | ECM                           |
| COL12A1 | ECM                           |
| COL13A1 | ECM                           |
| COL14A1 | ECM                           |
| COL15A1 | ECM                           |
| COL16A1 | ECM                           |
| COL17A1 | ECM                           |
| COL18A1 | ECM                           |
| COL19A1 | ECM                           |
| COL1A1  | ECM                           |
| COL1A2  | ECM                           |
| COL20A1 | ECM                           |
| COL21A1 | ECM                           |
| COL22A1 | ECM                           |
| COL23A1 | ECM                           |
| COL24A1 | ECM                           |
| COL25A1 | ECM                           |
| COL27A1 | ECM                           |
| COL28A1 | ECM                           |
| COL29A1 | ECM                           |
| COL2A1  | ECM                           |
| COL3A1  | ECM                           |
| COL4A1  | ECM                           |
| COL4A2  | ECM                           |
| COL4A3  | ECM                           |
| COL4A4  | ECM                           |
| COL4A5  | ECM                           |
| COL4A6  | ECM                           |
| COL5A1  | ECM                           |
| COL5A2  | ECM                           |
| COL5A3  | ECM                           |
| COL6A1  | ECM                           |
| COL6A3  | ECM                           |
| COL7A1  | ECM                           |
| COL8A1  | ECM                           |
| COL8A2  | ECM                           |
| COL9A1  | ECM                           |
| COL9A2  | ECM                           |
| COL9A3  | ECM                           |
| COMP    | ECM                           |
| CRELD1  | Soluble factors and receptors |
| CRTAP   | ECM                           |
| CSF1    | Soluble factors and receptors |
| CSF1R   | Soluble factors and receptors |
| CSF2    | Soluble factors and receptors |
| CSF2RA  | Soluble factors and receptors |
| CSF3    | Soluble factors and receptors |
| CSF3R   | Soluble factors and receptors |
| CSPG2   | Soluble factors and receptors |
| CSPG4   | Soluble factors and receptors |
| CTGF    | Soluble factors and receptors |
| CX3CL1  | Soluble factors and receptors |
| CX3CR1  | Soluble factors and receptors |
| CXCL1   | Soluble factors and receptors |

|        |                               |
|--------|-------------------------------|
| CXCL10 | Soluble factors and receptors |
| CXCL11 | Soluble factors and receptors |
| CXCL12 | Soluble factors and receptors |
| CXCL13 | Soluble factors and receptors |
| CXCL14 | Soluble factors and receptors |
| CXCL15 | Soluble factors and receptors |
| CXCL16 | Soluble factors and receptors |
| CXCL17 | Soluble factors and receptors |
| CXCL2  | Soluble factors and receptors |
| CXCL3  | Soluble factors and receptors |
| CXCL4  | Soluble factors and receptors |
| CXCL5  | Soluble factors and receptors |
| CXCL6  | Soluble factors and receptors |
| CXCL7  | Soluble factors and receptors |
| CXCL8  | Soluble factors and receptors |
| CXCL9  | Soluble factors and receptors |
| CXCR1  | Soluble factors and receptors |
| CXCR2  | Soluble factors and receptors |
| CXCR4  | Soluble factors and receptors |
| CXCR5  | Soluble factors and receptors |
| CXCR6  | Soluble factors and receptors |
| CYR61  | ECM                           |
| DCN    | ECM                           |
| DKK1   | Soluble factors and receptors |
| DKK2   | Soluble factors and receptors |
| DKK3   | Soluble factors and receptors |
| DMP1   | ECM                           |
| DMP3   | ECM                           |
| DSC1   | cell-cell adhesion            |
| DSC2   | cell-cell adhesion            |
| DSC3   | cell-cell adhesion            |
| DSG1   | cell-cell adhesion            |
| DSG2   | cell-cell adhesion            |
| DSG3   | cell-cell adhesion            |
| DSG4   | cell-cell adhesion            |
| DTR    | Soluble factors and receptors |
| ECM1   | ECM                           |
| ECM2   | ECM                           |
| EFEMP1 | ECM                           |
| EFEMP2 | ECM                           |
| EFNA1  | Soluble factors and receptors |
| EFNA2  | Soluble factors and receptors |
| EFNA3  | Soluble factors and receptors |
| EFNA4  | Soluble factors and receptors |
| EFNA5  | Soluble factors and receptors |
| EFNB1  | Soluble factors and receptors |
| EFNB2  | Soluble factors and receptors |
| EFNB3  | Soluble factors and receptors |
| EGF    | Soluble factors and receptors |
| EGFLAM | Soluble factors and receptors |
| EGFR   | Soluble factors and receptors |
| ELN    | ECM                           |
| EMID2  | ECM                           |
| EPGN   | ECM                           |
| EPHA1  | Soluble factors and receptors |
| EPHA10 | Soluble factors and receptors |

|       |                               |
|-------|-------------------------------|
| EPHA2 | Soluble factors and receptors |
| EPHA3 | Soluble factors and receptors |
| EPHA4 | Soluble factors and receptors |
| EPHA5 | Soluble factors and receptors |
| EPHA6 | Soluble factors and receptors |
| EPHA7 | Soluble factors and receptors |
| EPHA8 | Soluble factors and receptors |
| EPHA9 | Soluble factors and receptors |
| EPHB1 | Soluble factors and receptors |
| EPHB2 | Soluble factors and receptors |
| EPHB3 | Soluble factors and receptors |
| EPHB4 | Soluble factors and receptors |
| EPHB5 | Soluble factors and receptors |
| EPHB6 | Soluble factors and receptors |
| EPO   | Soluble factors and receptors |
| EPOR  | Soluble factors and receptors |
| EPR   | Soluble factors and receptors |
| ERBB2 | Soluble factors and receptors |
| ERBB3 | Soluble factors and receptors |
| ERBB4 | Soluble factors and receptors |
| FASLG | Soluble factors and receptors |
| FASR  | Soluble factors and receptors |
| FAT   | Soluble factors and receptors |
| FAT   | cell-cell adhesion            |
| FAT2  | Soluble factors and receptors |
| FAT2  | cell-cell adhesion            |
| FAT4  | Soluble factors and receptors |
| FAT4  | cell-cell adhesion            |
| FBLN1 | ECM                           |
| FBLN2 | ECM                           |
| FBLN3 | ECM                           |
| FBLN4 | ECM                           |
| FBLN5 | ECM                           |
| FBLN7 | ECM                           |
| FBN1  | ECM                           |
| FBN2  | ECM                           |
| FBN3  | ECM                           |
| FGA   | ECM                           |
| FGF1  | Soluble factors and receptors |
| FGF10 | Soluble factors and receptors |
| FGF11 | Soluble factors and receptors |
| FGF12 | Soluble factors and receptors |
| FGF13 | Soluble factors and receptors |
| FGF14 | Soluble factors and receptors |
| FGF17 | Soluble factors and receptors |
| FGF18 | Soluble factors and receptors |
| FGF19 | Soluble factors and receptors |
| FGF2  | Soluble factors and receptors |
| FGF20 | Soluble factors and receptors |
| FGF21 | Soluble factors and receptors |
| FGF22 | Soluble factors and receptors |
| FGF23 | Soluble factors and receptors |
| FGF3  | Soluble factors and receptors |
| FGF4  | Soluble factors and receptors |
| FGF5  | Soluble factors and receptors |
| FGF6  | Soluble factors and receptors |

|        |                               |
|--------|-------------------------------|
| FGF7   | Soluble factors and receptors |
| FGF8   | Soluble factors and receptors |
| FGF9   | Soluble factors and receptors |
| FGFR1  | Soluble factors and receptors |
| FGFR2  | Soluble factors and receptors |
| FGFR3  | Soluble factors and receptors |
| FGFR4  | Soluble factors and receptors |
| FGFR6  | Soluble factors and receptors |
| FLRT1  | ECM                           |
| FLRT2  | ECM                           |
| FLRT3  | ECM                           |
| FMOD   | ECM                           |
| FN1    | ECM                           |
| FSTL1  | soluble factors and receptors |
| FSTL3  | soluble factors and receptors |
| FZD1   | Soluble factors and receptors |
| FZD10  | Soluble factors and receptors |
| FZD2   | Soluble factors and receptors |
| FZD3   | Soluble factors and receptors |
| FZD4   | Soluble factors and receptors |
| FZD5   | Soluble factors and receptors |
| FZD6   | Soluble factors and receptors |
| FZD7   | Soluble factors and receptors |
| FZD8   | Soluble factors and receptors |
| FZD9   | Soluble factors and receptors |
| GAS1   | soluble factors and receptors |
| GAS6   | soluble factors and receptors |
| GDF9   | soluble factors and receptors |
| GH     | soluble factors and receptors |
| GHR    | soluble factors and receptors |
| HBEGF  | soluble factors and receptors |
| HGF    | soluble factors and receptors |
| HGFR   | soluble factors and receptors |
| HMCN1  | ECM                           |
| HSPG2  | ECM                           |
| ICAM1  | cell-cell adhesion            |
| ICAM2  | cell-cell adhesion            |
| ICAM3  | cell-cell adhesion            |
| ICAM4  | cell-cell adhesion            |
| ICAM5  | cell-cell adhesion            |
| IFNA   | Soluble factors and receptors |
| IFNAR  | Soluble factors and receptors |
| IFNB   | Soluble factors and receptors |
| IFNE   | Soluble factors and receptors |
| IFNG   | Soluble factors and receptors |
| IGF1   | Soluble factors and receptors |
| IGF1R  | Soluble factors and receptors |
| IGF2   | Soluble factors and receptors |
| IGF2R  | Soluble factors and receptors |
| IGFBP1 | Soluble factors and receptors |
| IGFBP2 | Soluble factors and receptors |
| IGFBP3 | Soluble factors and receptors |
| IGFBP4 | Soluble factors and receptors |
| IGFBP5 | Soluble factors and receptors |
| IGFBP6 | Soluble factors and receptors |
| IGFBP7 | Soluble factors and receptors |

|       |                               |
|-------|-------------------------------|
| IL1   | Soluble factors and receptors |
| IL10  | Soluble factors and receptors |
| IL10R | Soluble factors and receptors |
| IL11  | Soluble factors and receptors |
| IL11R | Soluble factors and receptors |
| IL12  | Soluble factors and receptors |
| IL12R | Soluble factors and receptors |
| IL13  | Soluble factors and receptors |
| IL13R | Soluble factors and receptors |
| IL14  | Soluble factors and receptors |
| IL14R | Soluble factors and receptors |
| IL15  | Soluble factors and receptors |
| IL15R | Soluble factors and receptors |
| IL16  | Soluble factors and receptors |
| IL16R | Soluble factors and receptors |
| IL17  | Soluble factors and receptors |
| IL17R | Soluble factors and receptors |
| IL18  | Soluble factors and receptors |
| IL18R | Soluble factors and receptors |
| IL19  | Soluble factors and receptors |
| IL19R | Soluble factors and receptors |
| IL1R  | Soluble factors and receptors |
| IL2   | Soluble factors and receptors |
| IL20  | Soluble factors and receptors |
| IL20R | Soluble factors and receptors |
| IL21  | Soluble factors and receptors |
| IL21R | Soluble factors and receptors |
| IL22  | Soluble factors and receptors |
| IL22R | Soluble factors and receptors |
| IL23  | Soluble factors and receptors |
| IL23R | Soluble factors and receptors |
| IL24  | Soluble factors and receptors |
| IL25  | Soluble factors and receptors |
| IL26  | Soluble factors and receptors |
| IL27  | Soluble factors and receptors |
| IL27R | Soluble factors and receptors |
| IL28  | Soluble factors and receptors |
| IL28R | Soluble factors and receptors |
| IL29  | Soluble factors and receptors |
| IL2R  | Soluble factors and receptors |
| IL3   | Soluble factors and receptors |
| IL30  | Soluble factors and receptors |
| IL31  | Soluble factors and receptors |
| IL32  | Soluble factors and receptors |
| IL33  | Soluble factors and receptors |
| IL35  | Soluble factors and receptors |
| IL3R  | Soluble factors and receptors |
| IL4   | Soluble factors and receptors |
| IL4R  | Soluble factors and receptors |
| IL5   | Soluble factors and receptors |
| IL5R  | Soluble factors and receptors |
| IL6   | Soluble factors and receptors |
| IL6R  | Soluble factors and receptors |
| IL6ST | Soluble factors and receptors |
| IL7   | Soluble factors and receptors |
| IL7R  | Soluble factors and receptors |



|        |                               |
|--------|-------------------------------|
| IL8    | Soluble factors and receptors |
| IL8R   | Soluble factors and receptors |
| IL9    | Soluble factors and receptors |
| INFGR  | Soluble factors and receptors |
| INHBA  | Soluble factors and receptors |
| ITGA1  | ECM                           |
| ITGA10 | ECM                           |
| ITGA11 | ECM                           |
| ITGA2  | ECM                           |
| ITGA3  | ECM                           |
| ITGA4  | ECM                           |
| ITGA5  | ECM                           |
| ITGA6  | ECM                           |
| ITGA7  | ECM                           |
| ITGA8  | ECM                           |
| ITGA9  | ECM                           |
| ITGAD  | ECM                           |
| ITGAE  | ECM                           |
| ITGAL  | ECM                           |
| ITGAM  | ECM                           |
| ITGAV  | ECM                           |
| ITGAW  | ECM                           |
| ITGAX  | ECM                           |
| ITGB1  | ECM                           |
| ITGB2  | ECM                           |
| ITGB3  | ECM                           |
| ITGB4  | ECM                           |
| ITGB5  | ECM                           |
| ITGB6  | ECM                           |
| ITGB7  | ECM                           |
| ITGB8  | ECM                           |
| ITGBL1 | ECM                           |
| KERA   | ECM                           |
| L1CAM  | cell-cell adhesion            |
| LAMA1  | ECM                           |
| LAMA2  | ECM                           |
| LAMA3  | ECM                           |
| LAMA4  | ECM                           |
| LAMA5  | ECM                           |
| LAMB1  | ECM                           |
| LAMB2  | ECM                           |
| LAMB3  | ECM                           |
| LAMB4  | ECM                           |
| LAMB5  | ECM                           |
| LAMC1  | ECM                           |
| LAMC2  | ECM                           |
| LAMC3  | ECM                           |
| LIBC   | Soluble factors and receptors |
| LIF    | Soluble factors and receptors |
| LIFR   | Soluble factors and receptors |
| LOX    | ECM remodeling-related        |
| LOXL1  | ECM remodeling-related        |
| LOXL2  | ECM remodeling-related        |
| LOXL3  | ECM remodeling-related        |
| LOXL4  | ECM remodeling-related        |
| LP     | Soluble factors and receptors |

|        |                               |
|--------|-------------------------------|
| LTBP1  | Soluble factors and receptors |
| LTBP2  | Soluble factors and receptors |
| LTBP3  | Soluble factors and receptors |
| LTBP4  | Soluble factors and receptors |
| LUM    | ECM                           |
| MATN1  | ECM                           |
| MATN2  | ECM                           |
| MATN3  | ECM                           |
| MEGF10 | Soluble factors and receptors |
| MEGF12 | Soluble factors and receptors |
| MEGF6  | Soluble factors and receptors |
| MEGF8  | Soluble factors and receptors |
| MEGF9  | Soluble factors and receptors |
| MFAP1  | ECM                           |
| MFAP2  | ECM                           |
| MFAP3  | ECM                           |
| MFAP5  | ECM                           |
| MGP    | ECM                           |
| MMP1   | ECM remodeling-related        |
| MMP10  | ECM remodeling-related        |
| MMP11  | ECM remodeling-related        |
| MMP12  | ECM remodeling-related        |
| MMP13  | ECM remodeling-related        |
| MMP14  | ECM remodeling-related        |
| MMP15  | ECM remodeling-related        |
| MMP16  | ECM remodeling-related        |
| MMP17  | ECM remodeling-related        |
| MMP18  | ECM remodeling-related        |
| MMP19  | ECM remodeling-related        |
| MMP2   | ECM remodeling-related        |
| MMP20  | ECM remodeling-related        |
| MMP21  | ECM remodeling-related        |
| MMP23a | ECM remodeling-related        |
| MMP23B | ECM remodeling-related        |
| MMP24  | ECM remodeling-related        |
| MMP25  | ECM remodeling-related        |
| MMP26  | ECM remodeling-related        |
| MMP27  | ECM remodeling-related        |
| MMP28  | ECM remodeling-related        |
| MMP3   | ECM remodeling-related        |
| MMP7   | ECM remodeling-related        |
| MMP8   | ECM remodeling-related        |
| MMP9   | ECM remodeling-related        |
| MPL    | Soluble factors and receptors |
| MSTN   | Soluble factors and receptors |
| MUC1   | ECM                           |
| MUC12  | ECM                           |
| MUC13  | ECM                           |
| MUC15  | ECM                           |
| MUC16  | ECM                           |
| MUC17  | ECM                           |
| MUC19  | ECM                           |
| MUC2   | ECM                           |
| MUC20  | ECM                           |
| MUC3   | ECM                           |
| MUC4   | ECM                           |

|         |                               |
|---------|-------------------------------|
| MUC5    | ECM                           |
| MUC6    | ECM                           |
| MUC7    | ECM                           |
| MUC8    | ECM                           |
| NCAM1   | cell-cell adhesion            |
| NCAN    | Cell-cell adhesion            |
| NELL2   | ECM                           |
| NGF     | Soluble factors and receptors |
| NID1    | ECM                           |
| NOV     | Soluble factors and receptors |
| NRG1    | Soluble factors and receptors |
| NRG2    | Soluble factors and receptors |
| NRG3    | Soluble factors and receptors |
| NRG4    | Soluble factors and receptors |
| NRXN1   | Cell-cell adhesion            |
| NRXN2   | Cell-cell adhesion            |
| NRXN3   | Cell-cell adhesion            |
| NTN1    | ECM                           |
| NTN2L   | ECM                           |
| NTN4    | ECM                           |
| NTNG1   | ECM                           |
| NTNG2   | ECM                           |
| OSM     | Soluble factors and receptors |
| OSMR    | Soluble factors and receptors |
| PAPLN   | ECM                           |
| PCDH1   | cell-cell adhesion            |
| PCDH11X | cell-cell adhesion            |
| PCDHA   | cell-cell adhesion            |
| PCDHB   | cell-cell adhesion            |
| PCDHG   | cell-cell adhesion            |
| PCLKC   | cell-cell adhesion            |
| PCOLCE  | ECM remodeling-related        |
| PDGFA   | Soluble factors and receptors |
| PDGFB   | Soluble factors and receptors |
| PDGFC   | Soluble factors and receptors |
| PDGFD   | Soluble factors and receptors |
| PDGFRA  | Soluble factors and receptors |
| PDGFRB  | Soluble factors and receptors |
| PECAM1  | cell-cell adhesion            |
| PGF     | Soluble factors and receptors |
| PLAT    | ECM remodeling-related        |
| PLAU    | ECM remodeling-related        |
| PLAUR   | ECM remodeling-related        |
| PLG     | ECM remodeling-related        |
| PLOD1   | ECM remodeling-related        |
| PRELP   | ECM                           |
| PRL     | Soluble factors and receptors |
| PRLR    | Soluble factors and receptors |
| PROS1   | Soluble factors and receptors |
| RESDA1  | Cell-cell adhesion            |
| RESDA1  | cell-cell adhesion            |
| RET     | cell-cell adhesion            |
| RSPO1   | Soluble factors and receptors |
| RSPO2   | Soluble factors and receptors |
| RSPO3   | Soluble factors and receptors |
| SELE    | cell-cell adhesion            |

|           |                               |
|-----------|-------------------------------|
| SELL      | Cell-cell adhesion            |
| SELP      | cell-cell adhesion            |
| SEMA5A    | Soluble factors and receptors |
| SEMA5B    | Soluble factors and receptors |
| SEPP1     | Soluble factors and receptors |
| SERPINA1  | ECM remodeling-related        |
| SERPINA10 | ECM remodeling-related        |
| SERPINA11 | ECM remodeling-related        |
| SERPINA12 | ECM remodeling-related        |
| SERPINA13 | ECM remodeling-related        |
| SERPINA2  | ECM remodeling-related        |
| SERPINA3  | ECM remodeling-related        |
| SERPINA4  | ECM remodeling-related        |
| SERPINA5  | ECM remodeling-related        |
| SERPINA6  | ECM remodeling-related        |
| SERPINA7  | ECM remodeling-related        |
| SERPINA8  | ECM remodeling-related        |
| SERPINA9  | ECM remodeling-related        |
| SERPINC1  | ECM remodeling-related        |
| SERPIND1  | ECM remodeling-related        |
| SERPINE1  | ECM remodeling-related        |
| SERPINE2  | ECM remodeling-related        |
| SERPINF1  | ECM remodeling-related        |
| SERPINF2  | ECM remodeling-related        |
| SERPING1  | ECM remodeling-related        |
| SERPINH1  | ECM remodeling-related        |
| SERPINI1  | ECM remodeling-related        |
| SERPINI2  | ECM remodeling-related        |
| SKALP     | ECM remodeling-related        |
| SLIT1     | soluble factors and receptors |
| SLIT2     | soluble factors and receptors |
| SLIT3     | soluble factors and receptors |
| SMC3      | ECM                           |
| SPARC     | ECM remodeling-related        |
| SPON1     | ECM                           |
| SPON2     | ECM                           |
| SPP1      | ECM                           |
| SSPO      | ECM remodeling-related        |
| STAB1     | Soluble factors and receptors |
| SULF1     | Soluble factors and receptors |
| SULF2     | Soluble factors and receptors |
| TFPI      | Soluble factors and receptors |
| TFPI2     | Soluble factors and receptors |
| TGFA      | Soluble factors and receptors |
| TGFB1     | Soluble factors and receptors |
| TGFB2     | Soluble factors and receptors |
| TGFB3     | Soluble factors and receptors |
| TGFBI     | Soluble factors and receptors |
| TGFBR1    | Soluble factors and receptors |
| TGFBR2    | Soluble factors and receptors |
| TGFBR3    | Soluble factors and receptors |
| TGFBR5    | Soluble factors and receptors |
| TGFBRII   | Soluble factors and receptors |
| THBS1     | ECM                           |
| THBS2     | ECM                           |
| THBS3     | ECM                           |

|         |                               |
|---------|-------------------------------|
| THBS4   | ECM                           |
| THBS5   | ECM                           |
| THSD1   | ECM remodeling-related        |
| THSD3   | ECM remodeling-related        |
| THSD7   | ECM remodeling-related        |
| TIMP1   | ECM remodeling-related        |
| TIMP2   | ECM remodeling-related        |
| TIMP3   | ECM remodeling-related        |
| TIMP4   | ECM remodeling-related        |
| TLR1    | Soluble factors and receptors |
| TLR10   | Soluble factors and receptors |
| TLR2    | Soluble factors and receptors |
| TLR3    | Soluble factors and receptors |
| TLR4    | Soluble factors and receptors |
| TLR5    | Soluble factors and receptors |
| TLR6    | Soluble factors and receptors |
| TLR7    | Soluble factors and receptors |
| TLR8    | Soluble factors and receptors |
| TLR9    | Soluble factors and receptors |
| TNC     | Soluble factors and receptors |
| TNF     | Soluble factors and receptors |
| TNFB    | Soluble factors and receptors |
| TNFC    | Soluble factors and receptors |
| TNFSF1  | Soluble factors and receptors |
| TNFSF10 | Soluble factors and receptors |
| TNFSF11 | Soluble factors and receptors |
| TNFSF12 | Soluble factors and receptors |
| TNFSF13 | Soluble factors and receptors |
| TNFSF14 | Soluble factors and receptors |
| TNFSF2  | Soluble factors and receptors |
| TNFSF4  | Soluble factors and receptors |
| TNFSF5  | Soluble factors and receptors |
| TNFSF8  | Soluble factors and receptors |
| TNFSF9  | Soluble factors and receptors |
| TNR     | ECM                           |
| TNX     | ECM                           |
| TNY     | ECM                           |
| TPO     | Soluble factors and receptors |
| USH2A   | ECM                           |
| VCAM1   | cell-cell adhesion            |
| VCAN    | ECM                           |
| VEGFA   | Soluble factors and receptors |
| VEGFB   | Soluble factors and receptors |
| VEGFC   | Soluble factors and receptors |
| VEGFD   | Soluble factors and receptors |
| VEGFR1  | Soluble factors and receptors |
| VEGFR2  | Soluble factors and receptors |
| VEGFR3  | Soluble factors and receptors |
| VTN     | ECM                           |
| VWF     | ECM                           |
| WISP1   | Soluble factors and receptors |
| WISP2   | Soluble factors and receptors |
| WISP3   | Soluble factors and receptors |
| WNT1    | soluble factors and receptors |
| WNT10   | soluble factors and receptors |
| WNT11   | soluble factors and receptors |

|       |                               |
|-------|-------------------------------|
| WNT16 | soluble factors and receptors |
| WNT2  | soluble factors and receptors |
| WNT3  | soluble factors and receptors |
| WNT4  | soluble factors and receptors |
| WNT5  | soluble factors and receptors |
| WNT6  | soluble factors and receptors |
| WNT7  | soluble factors and receptors |
| WNT8  | soluble factors and receptors |
| WNT9  | soluble factors and receptors |
| XCR1  | soluble factors and receptors |
| XCR2  | soluble factors and receptors |
| XLC1  | soluble factors and receptors |
| XLC2  | soluble factors and receptors |

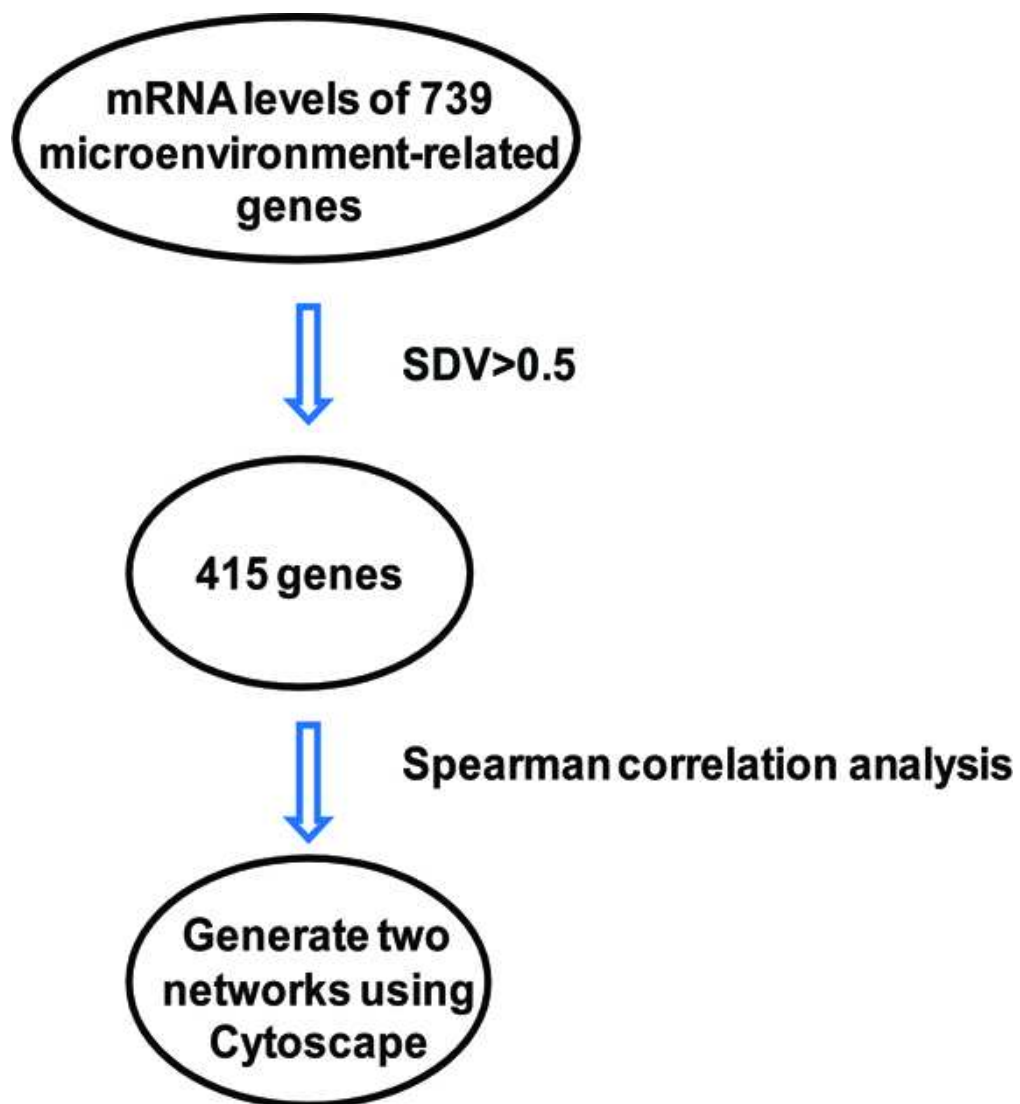

Fig S1. A scheme showing how the coexpression network analysis was performed. Messenger RNA levels of 739 microenvironmental-related genes were obtained from published breast cancer microarray data. Four hundred fifteen genes were selected for the further analysis based on standard deviation value of the mRNA levels. The genes whose mRNA levels are significantly correlated were used to construct microenvironment gene networks with Cytoscape.

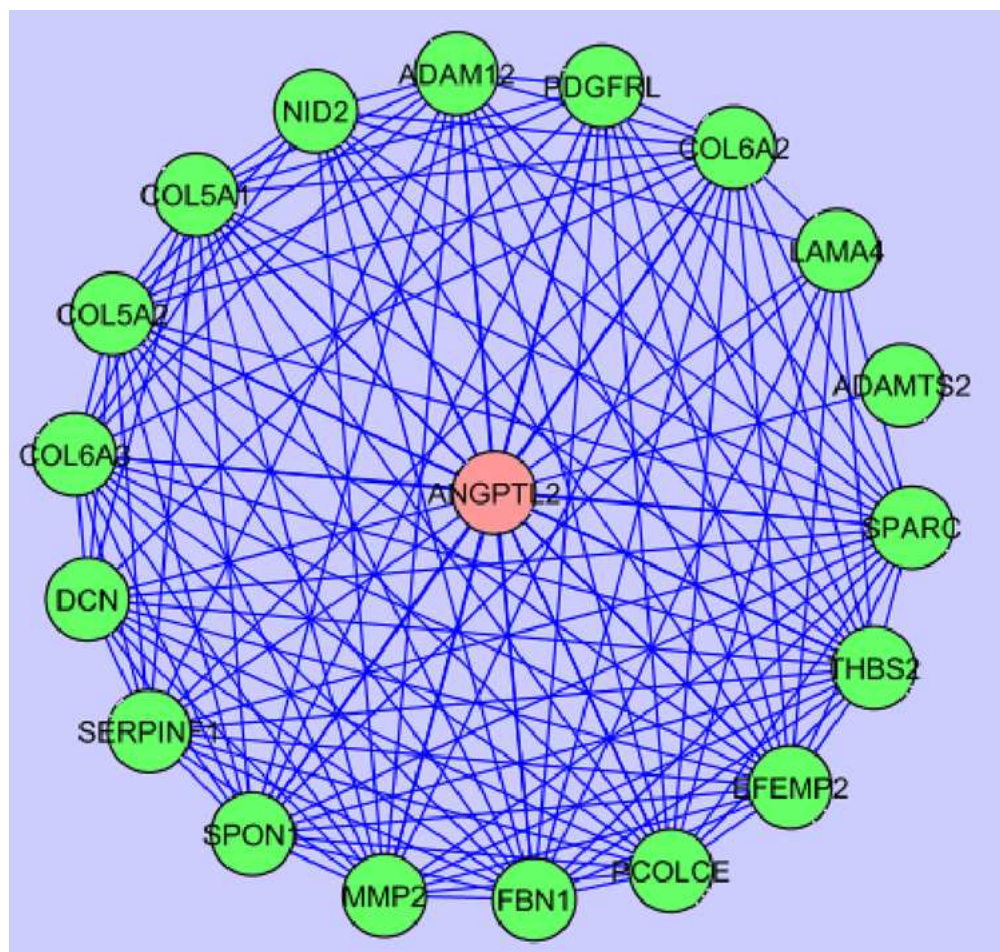

Fig S2. A network composed of ANGPTL2 and ECM-related genes may represent a functional connection between ANGPTL2 and ECM remodeling.
